# Supplementary material for: Aloperine Ameliorates IMQ-Induced Psoriasis by Attenuating Th17 Differentiation and Facilitating Their Conversion to Treg
Source: Frontiers journal article supplement (doi:10.3389/fphar.2022.778755), 2022-06-01

**Aloperine ameliorates IMQ-induced psoriasis by attenuating Th17 differentiation and facilitating their conversion to Treg**

Western-blot original data

**Figure 3F**

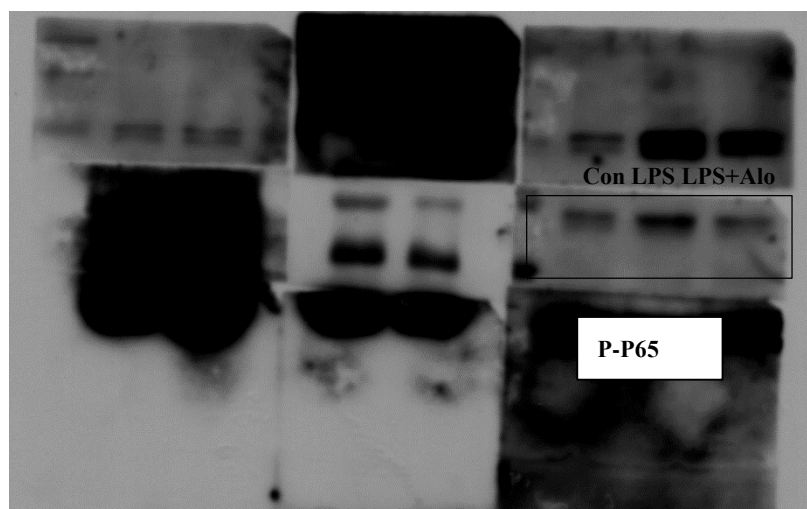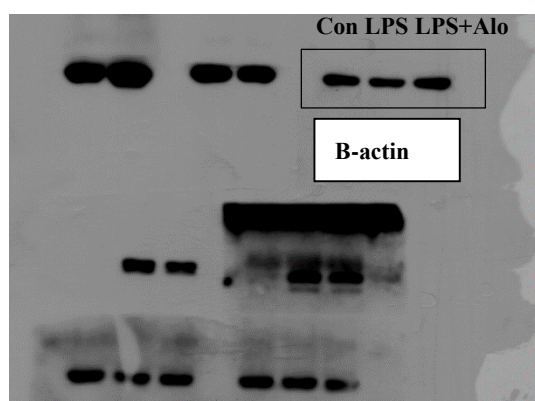

Figure 5D

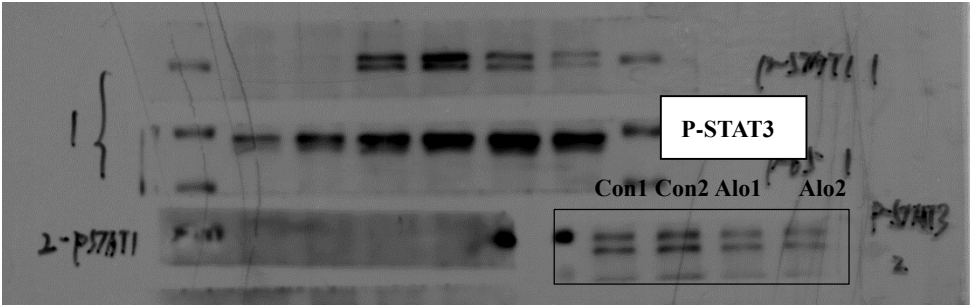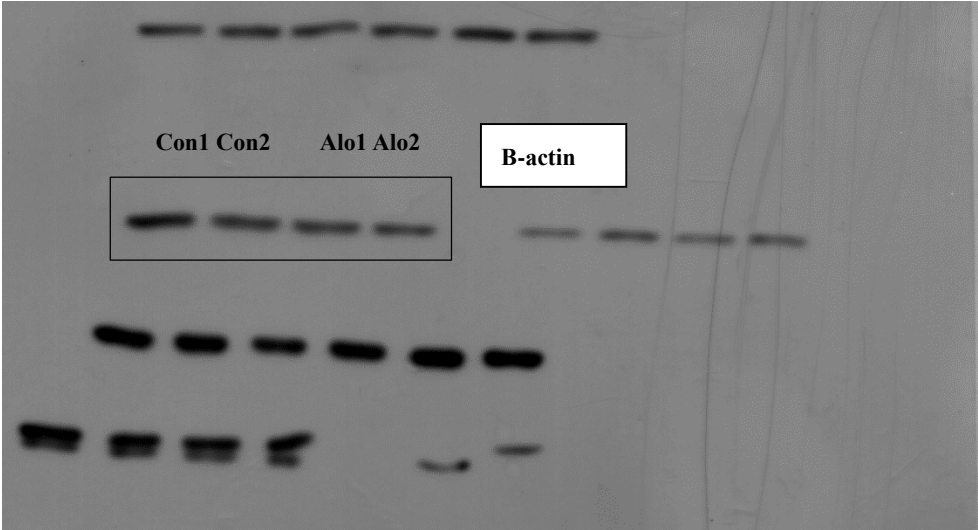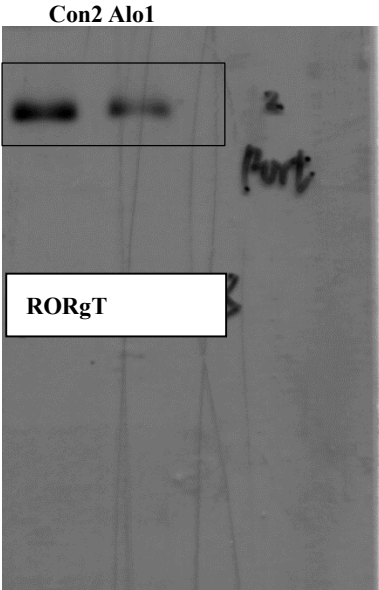

Figure 6B

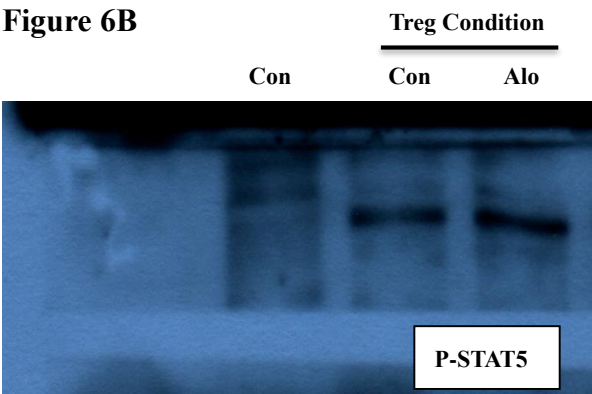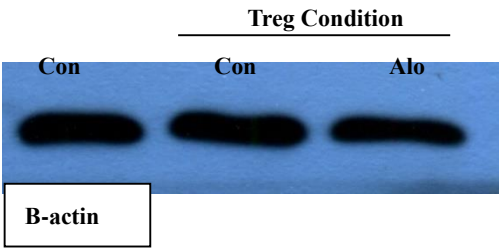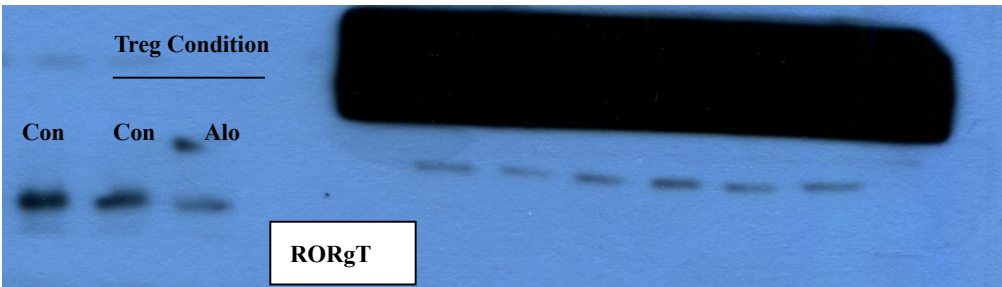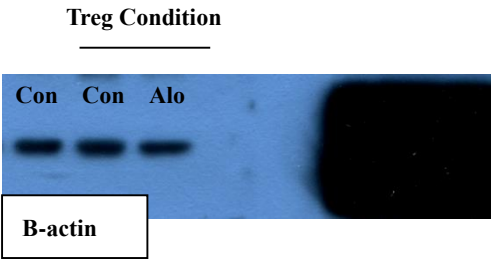

Supplement: Data_Sheet_1.PDF [file Data_Sheet_1.PDF]
